# Supplementary material for: Towards a comprehensive barcode library for arctic life - Ephemeroptera, Plecoptera, and Trichoptera of Churchill, Manitoba, Canada
Source: Springer Nature journal article supplement (doi:10.1186/1742-9994-6-30), 2009-01-01

*Ephemera  
simulans*

2%

*Fallceon thermophilos*  
complex

*Plauditus cf. dubius*

*Acentrella turbida*  
complex

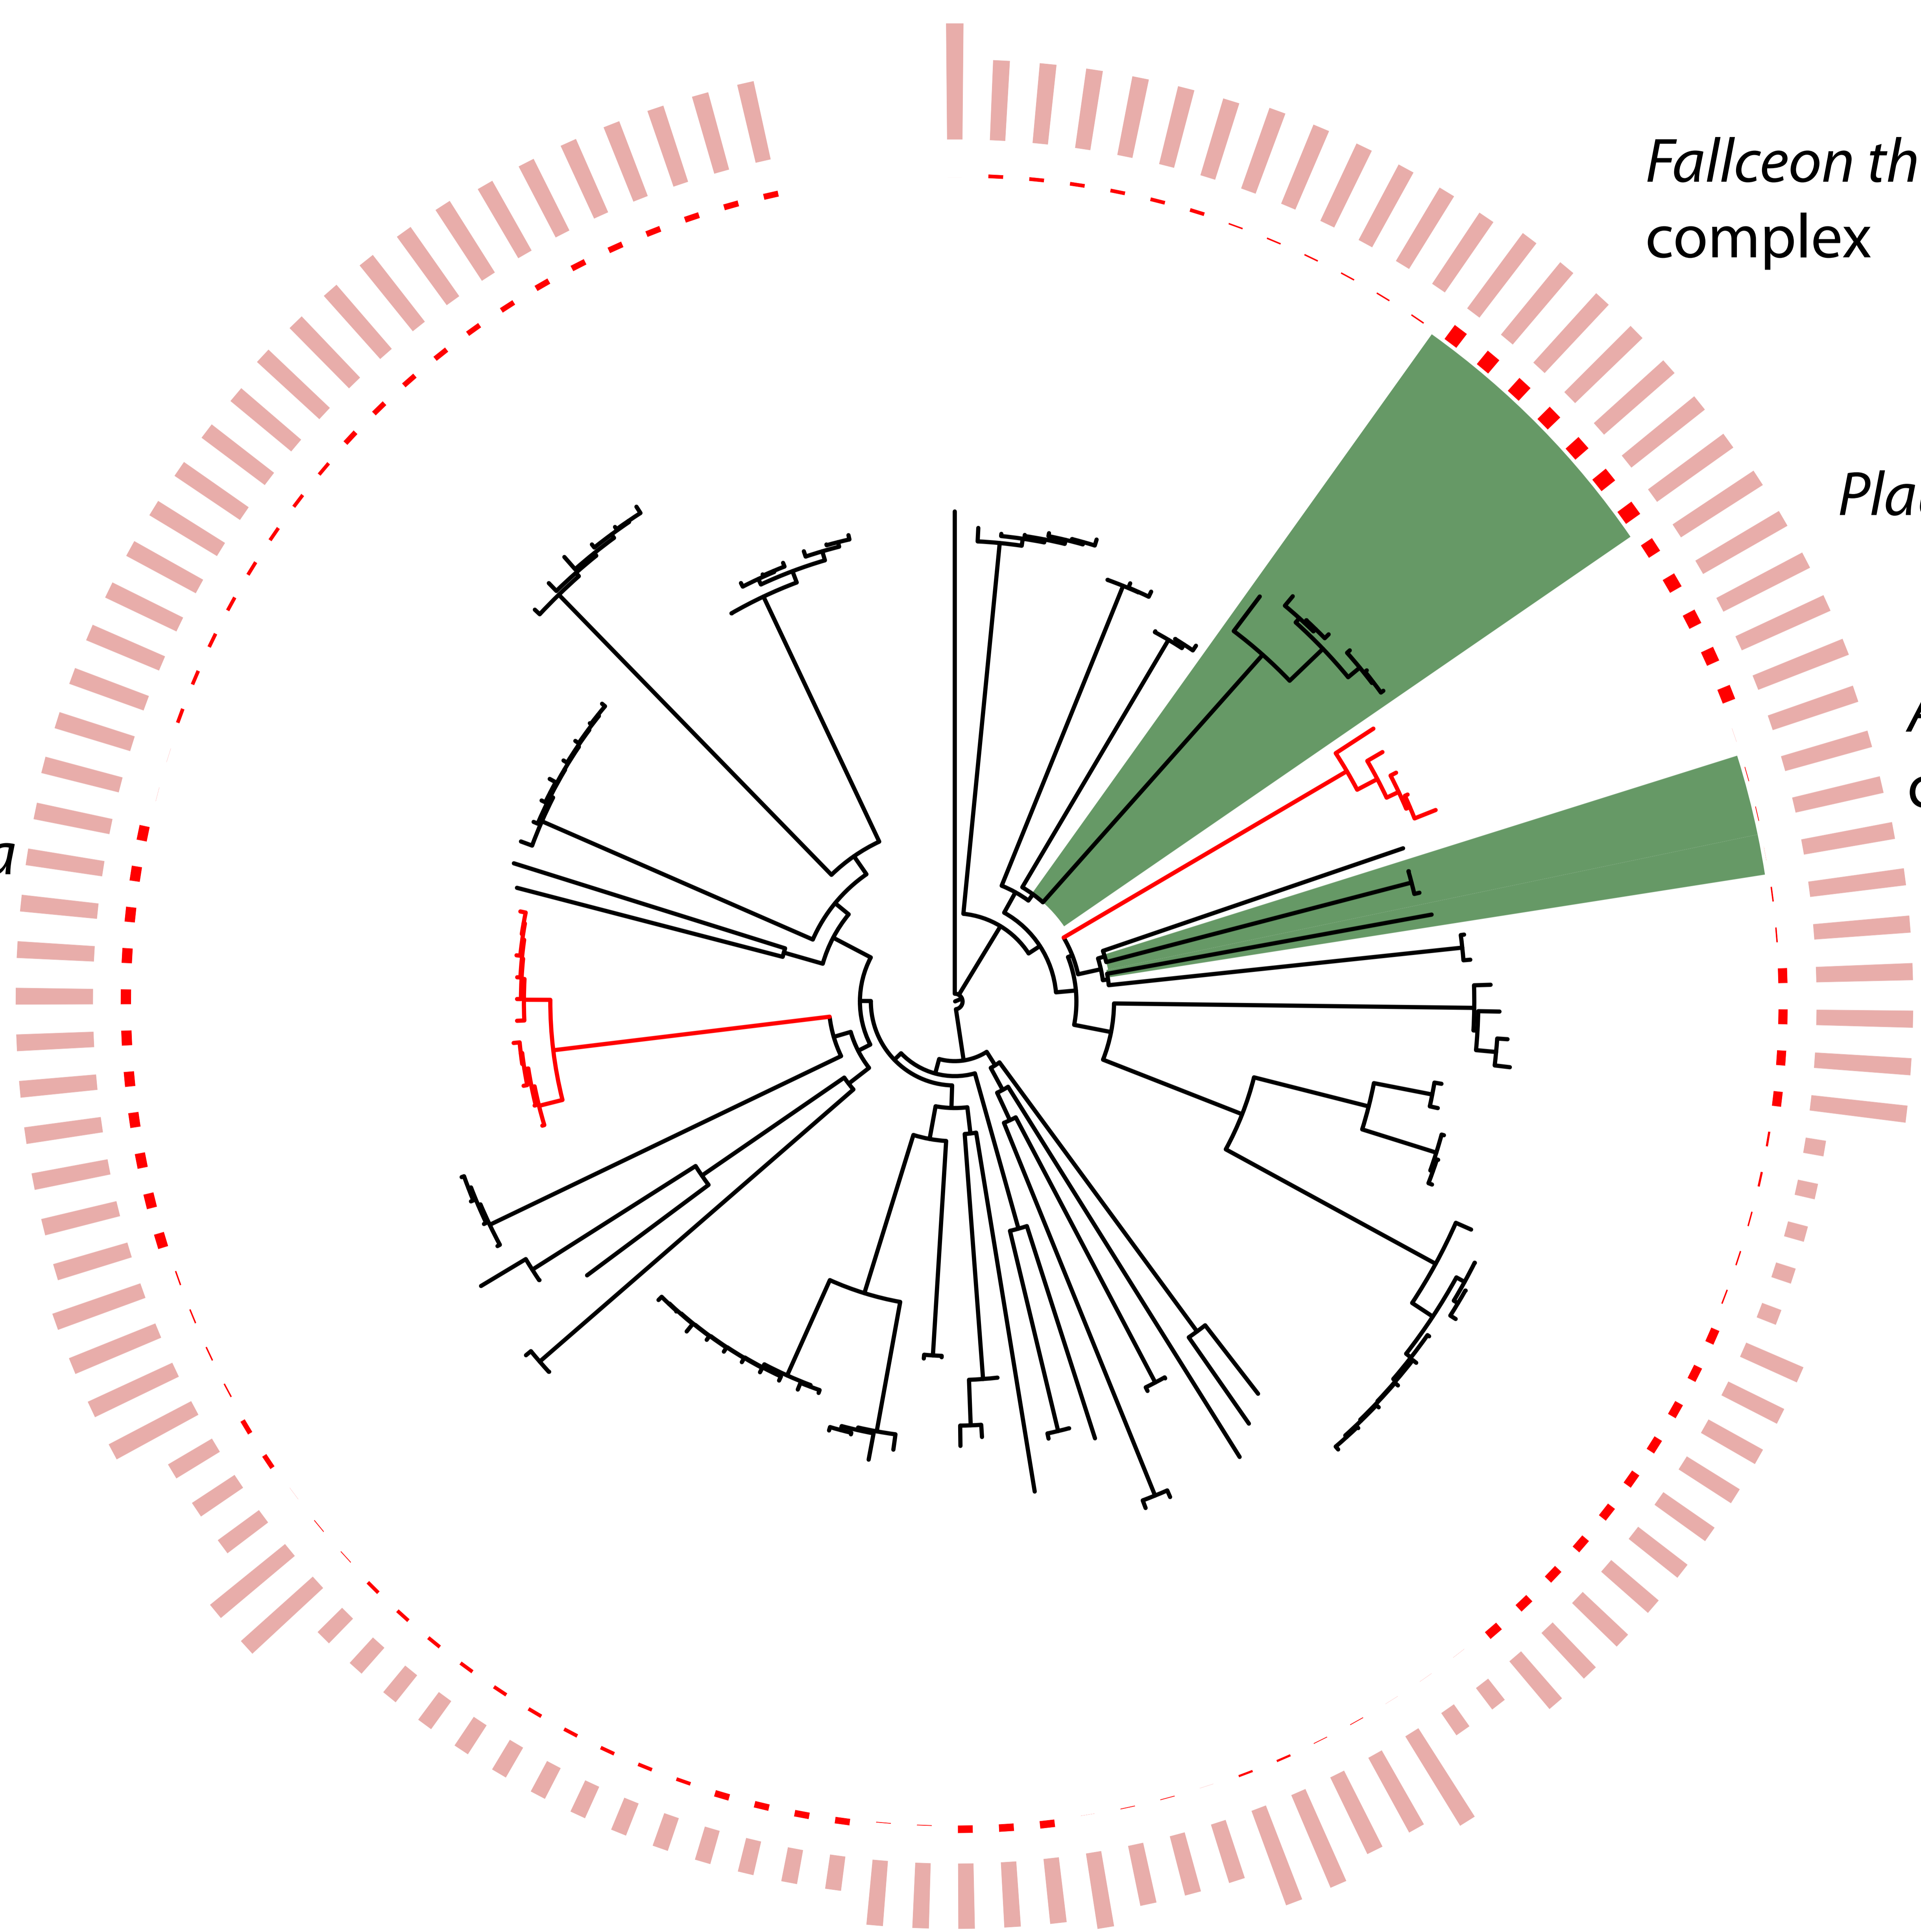

Supplement: 12983_2009_118_MOESM6_ESM.pdf [file 12983_2009_118_MOESM6_ESM.pdf]
