# Supplementary figures and images for: Towards a comprehensive barcode library for arctic life - Ephemeroptera, Plecoptera, and Trichoptera of Churchill, Manitoba, Canada
Source: Springer Nature journal article supplement (doi:10.1186/1742-9994-6-30), 2009-01-01

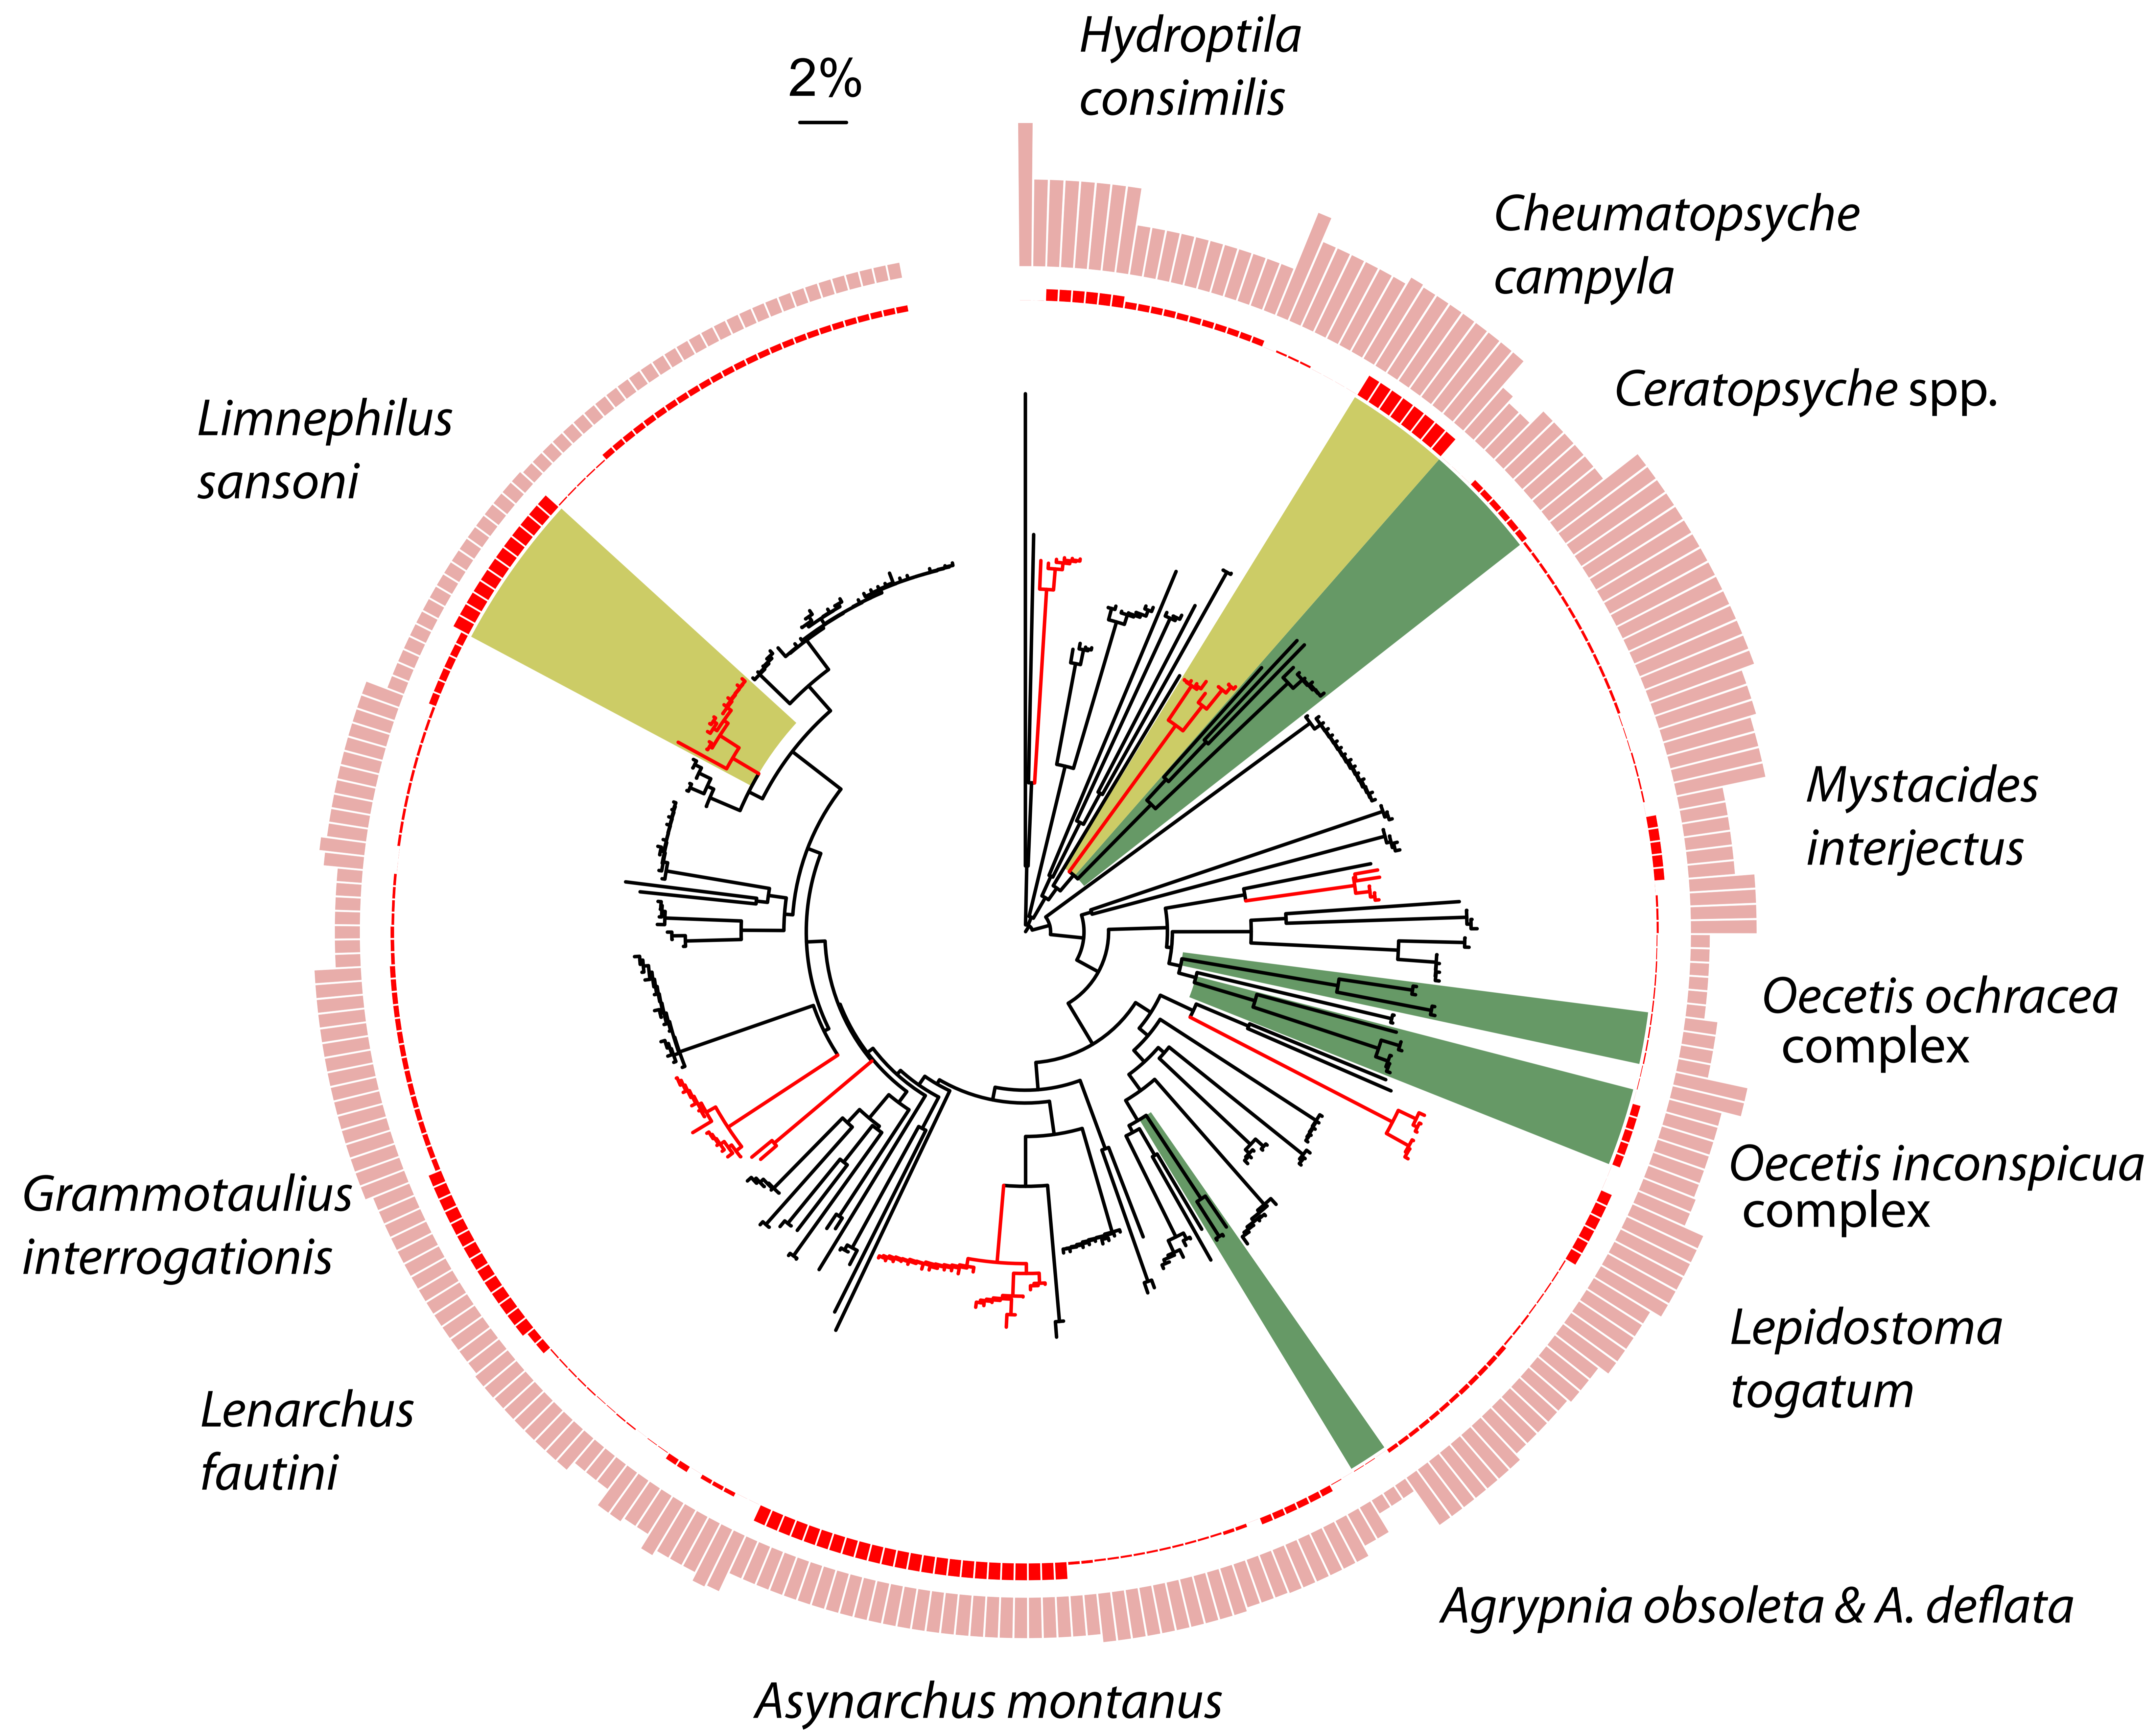

Supplement: 12983_2009_118_MOESM5_ESM.pdf [file 12983_2009_118_MOESM5_ESM.pdf]

2%

*Nemoura* sp. CHU1 & *N.* sp. CHU2

*Isoperla* sp.

*Amphinemura linda*

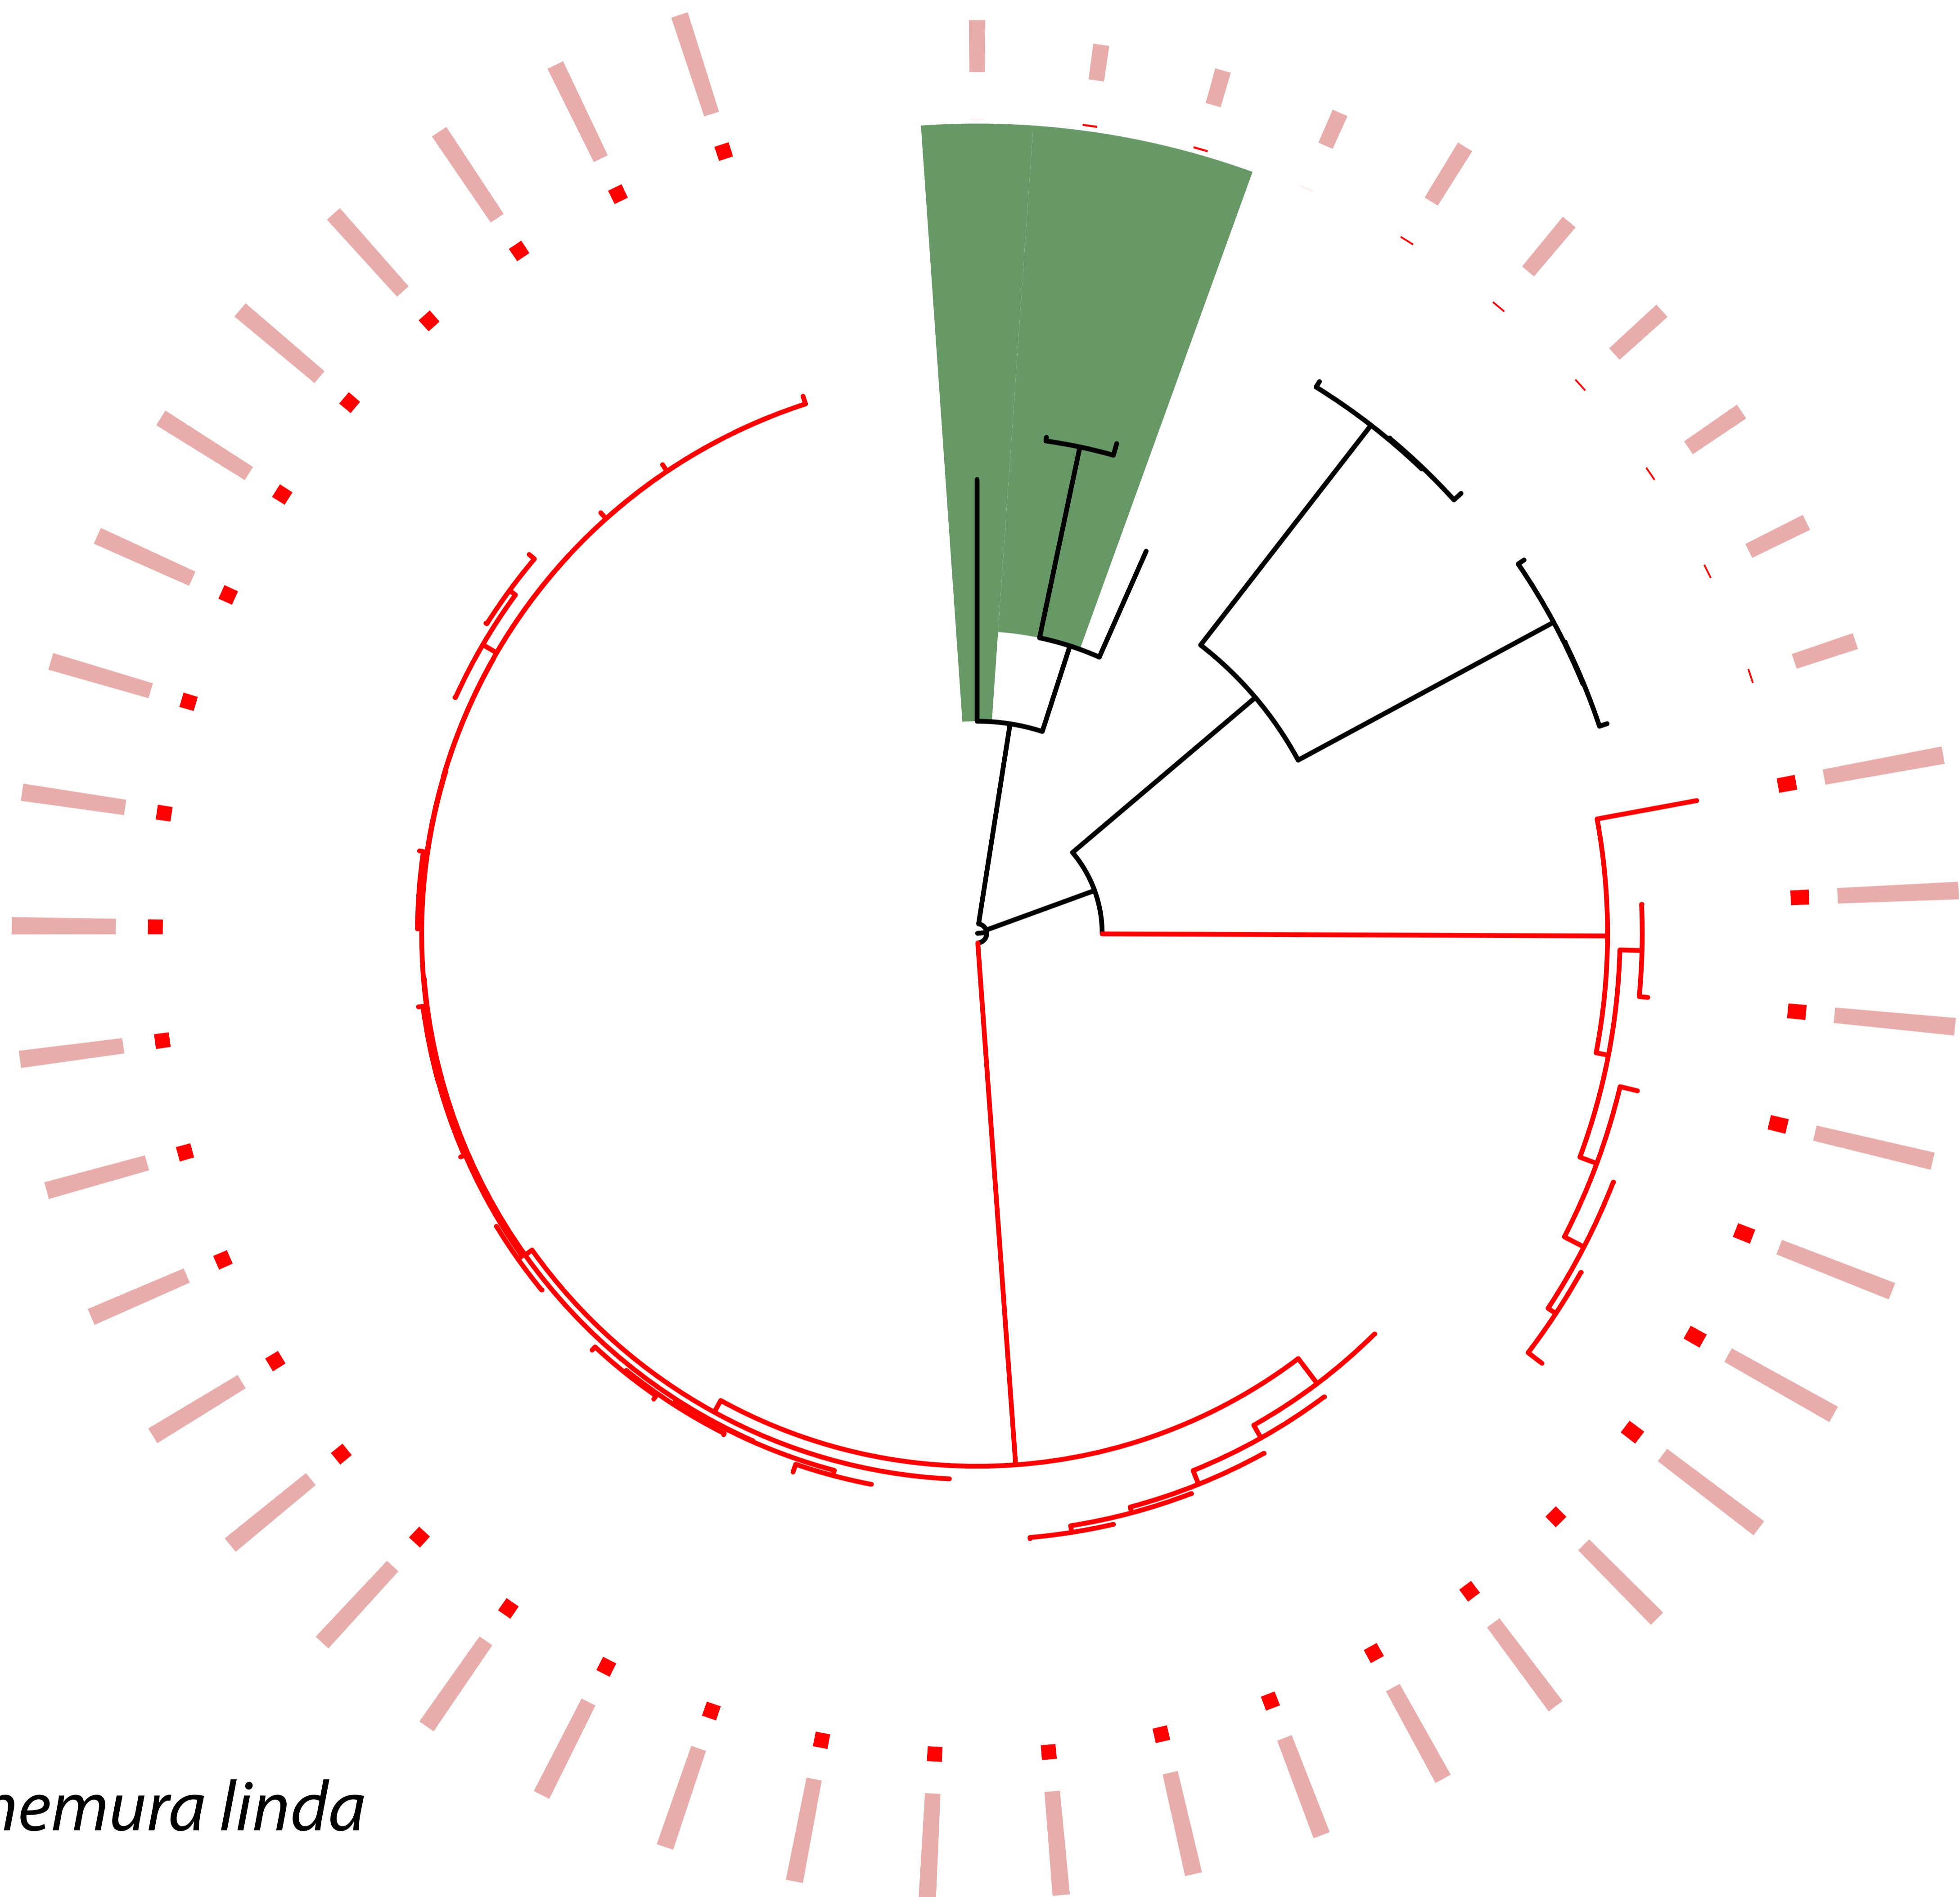

Supplement: 12983_2009_118_MOESM7_ESM.pdf [file 12983_2009_118_MOESM7_ESM.pdf]

## A. Trichoptera

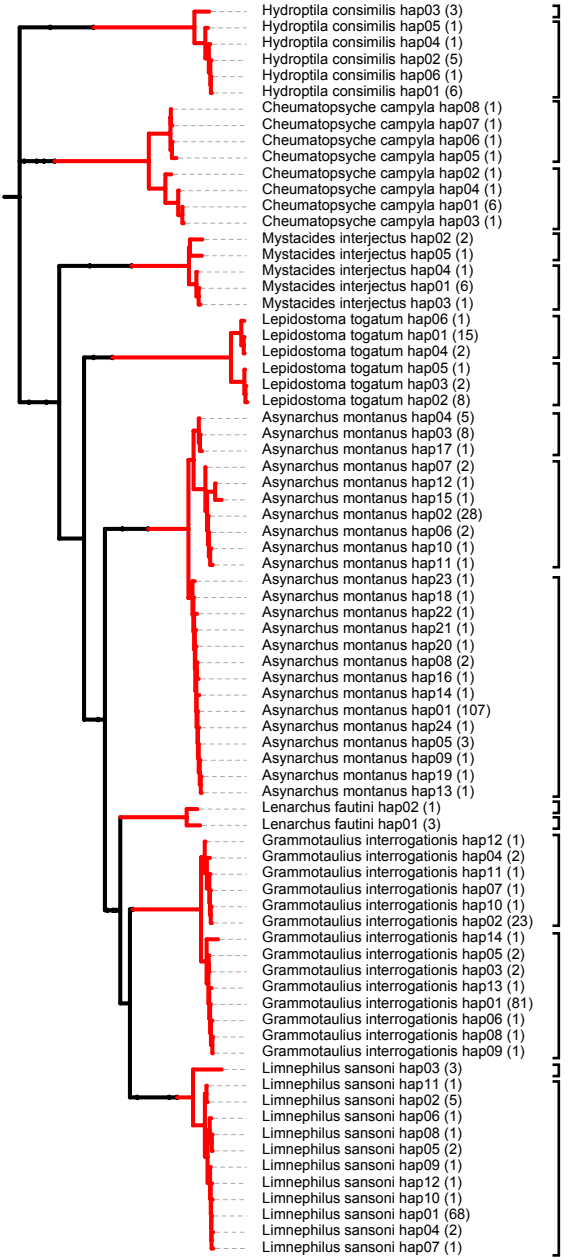

## B. Ephemeroptera

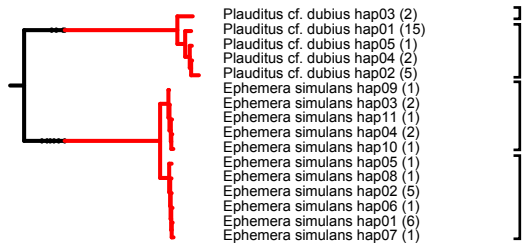

## C. Plecoptera

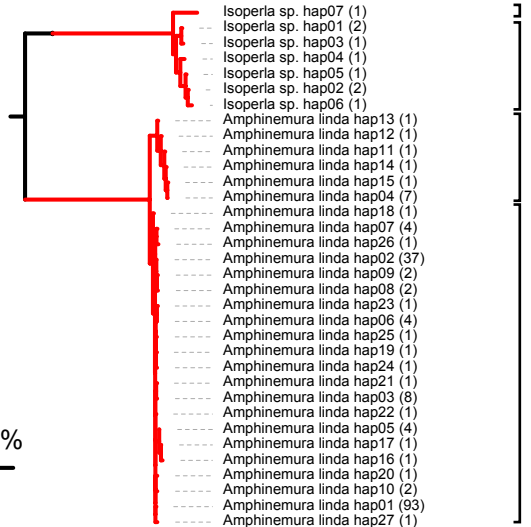

Supplement: 12983_2009_118_MOESM8_ESM.pdf [file 12983_2009_118_MOESM8_ESM.pdf]

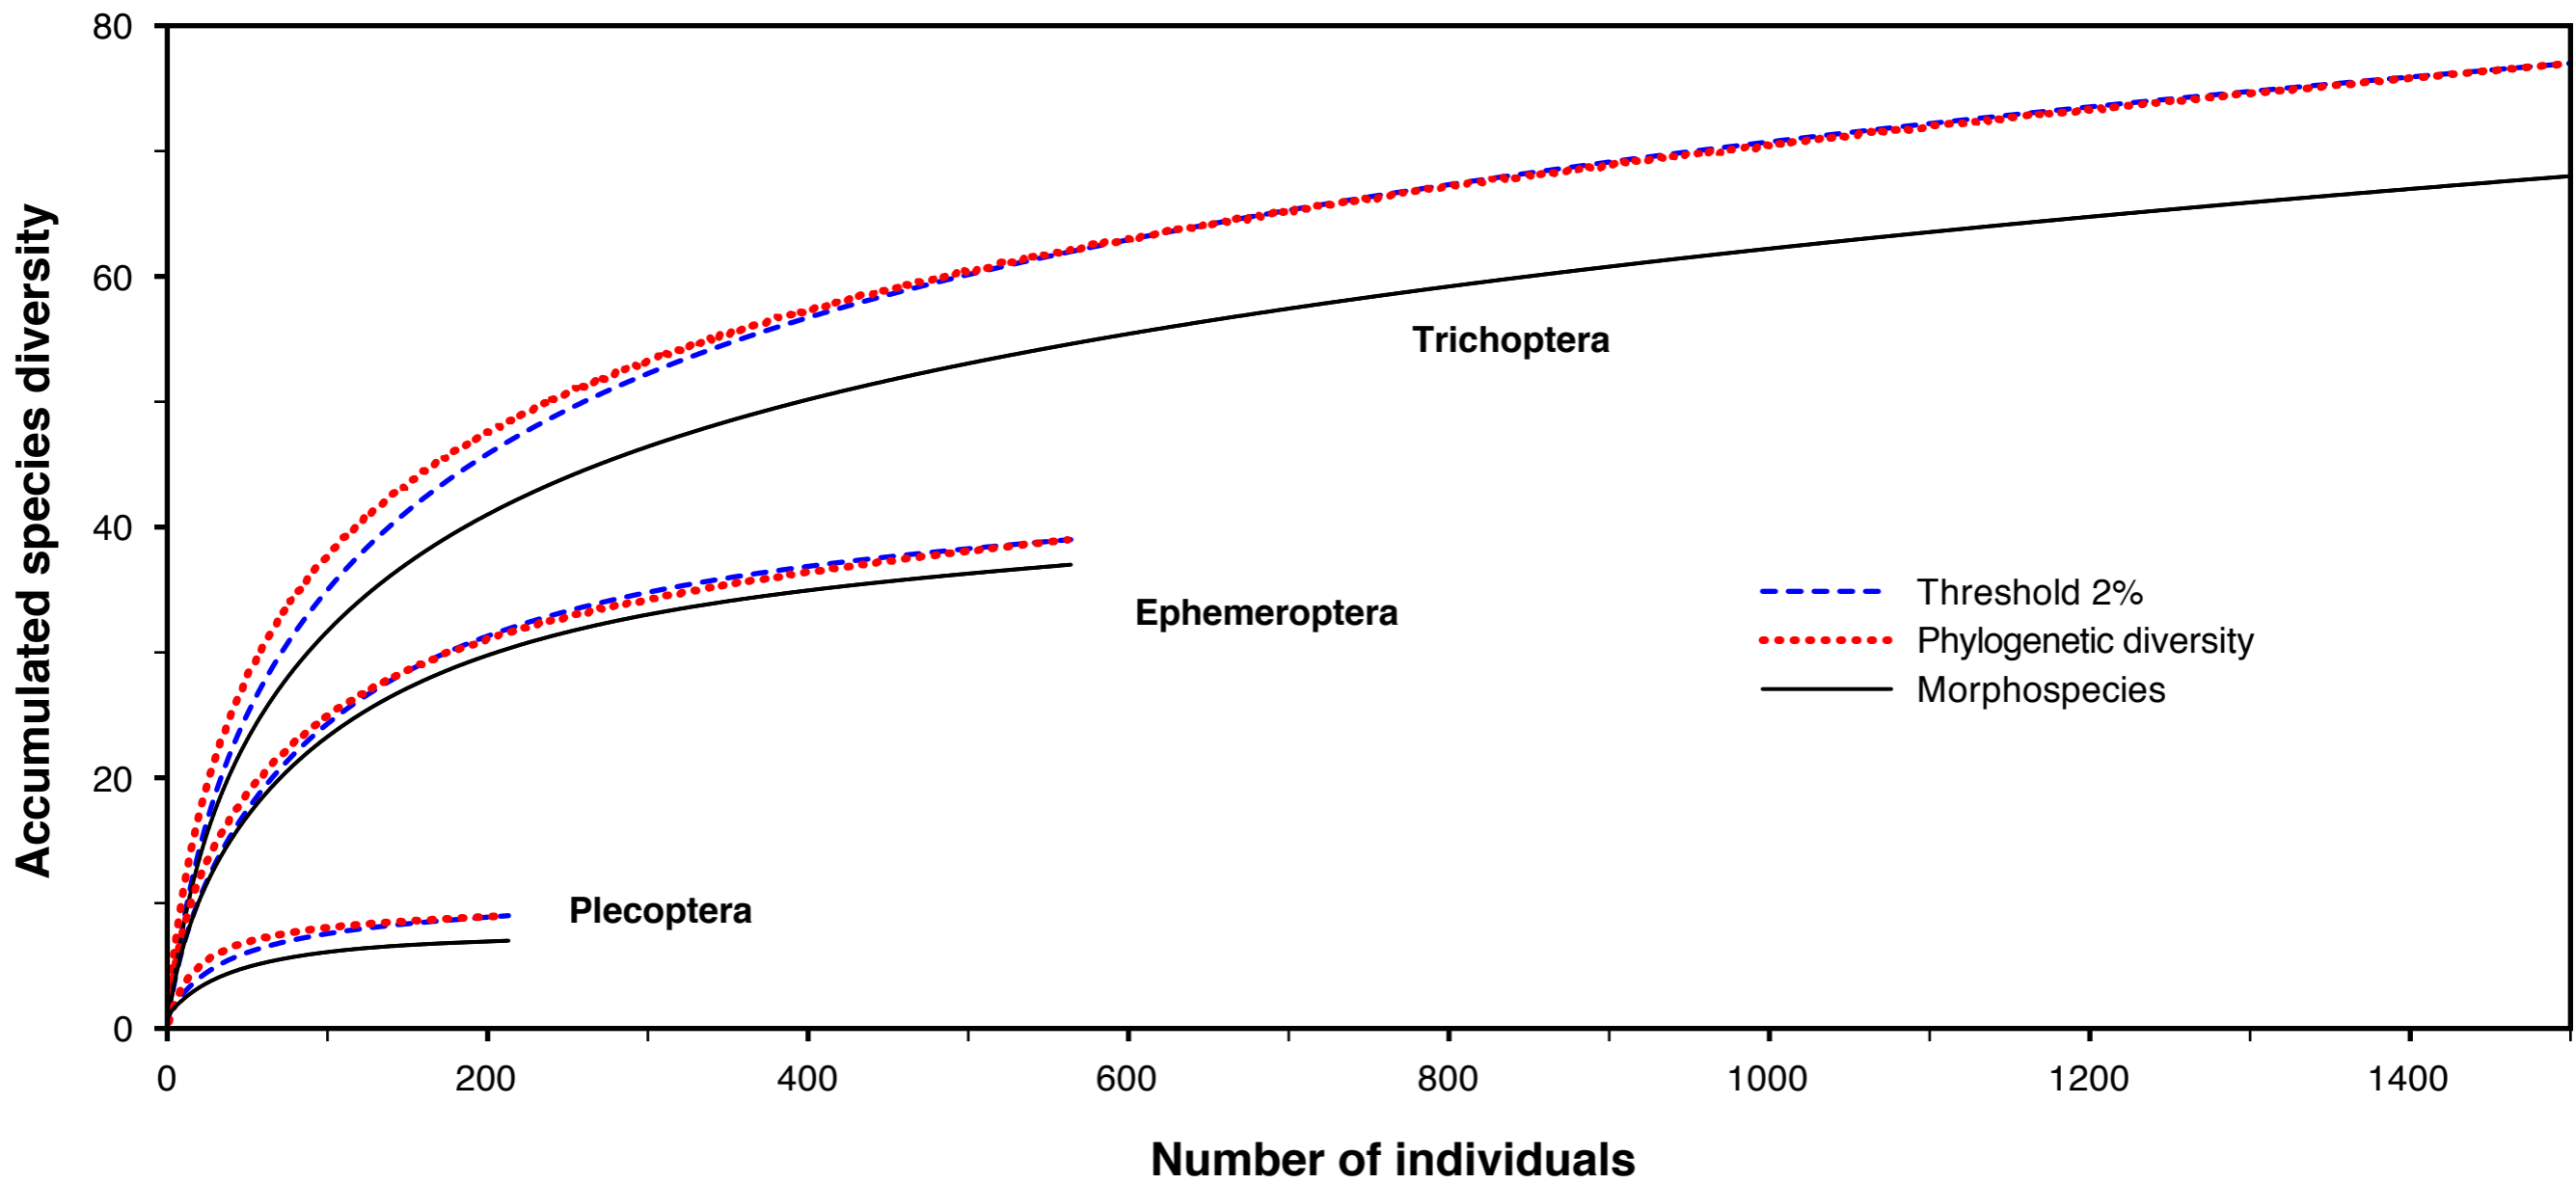

Supplement: 12983_2009_118_MOESM9_ESM.pdf [file 12983_2009_118_MOESM9_ESM.pdf]
